# Supplementary material for: Spatial and temporal changes of the ozone sensitivity in China basedon satellite and ground-based observations
Source: Copernicus journal article supplement (doi:10.5194/acp-2020-1097), 2020-12-14
Supplement: Supplementary file 1 [file acp-2020-1097-supplement.pdf]

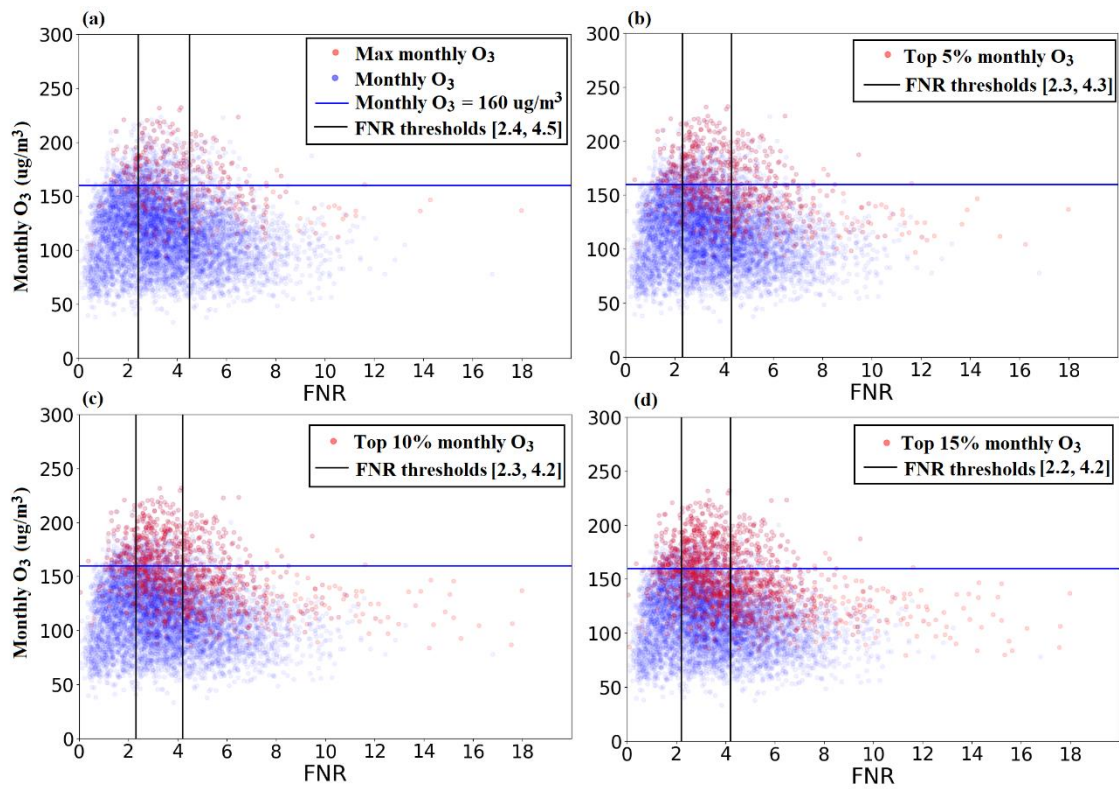

Figure S1. (a) The maximum of monthly  $O_3$  values and corresponding FNRs of each city. (b) same as (a), but for top 5%. (c) same as (a), but for top 10%. (d) same as (a), but for top 15%.

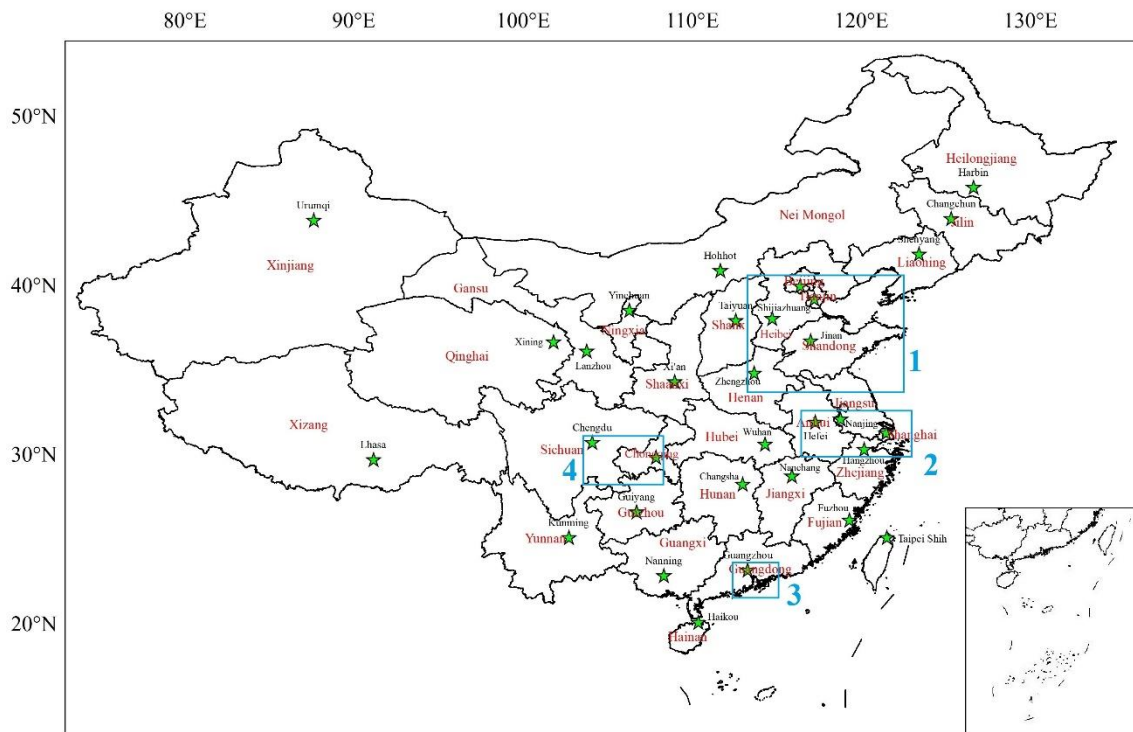

Figure S2. China provincial administrative division map. Red texts represent the provinces. Green stars represent the location of provincial capital city of each province. Black texts represent cities' name. The Blue frame 1, 2, 3, and 4 represent the North China Plain (NCP), the Yangtze River Delta (YRD), the Pearl River Delta (PRD) and the Sichuan Basin.

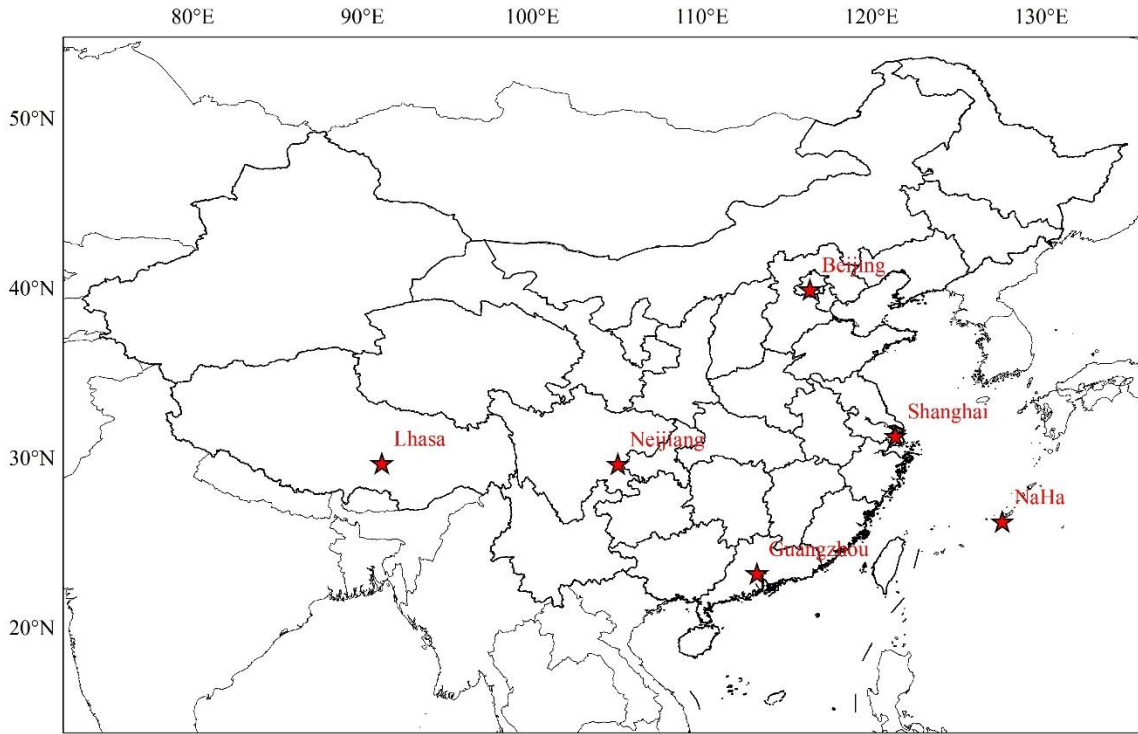

Figure S3. Location of six cities (Beijing, Shanghai, Guangzhou, Neijiang, Lhasa and NaHa).
